# Supplementary material for: SNX10 promotes phagosome maturation in macrophages and protects mice against Listeria monocytogenes infection
Source: PubMed Central journal article supplement (PMC5589552; doi:10.18632/oncotarget.19644), 2017-07-27
Supplement: oncotarget-08-53935-s001.pdf [file oncotarget-08-53935-s001.pdf]

## SNX10 promotes phagosome maturation in macrophages and protects mice against *Listeria monocytogenes* infection

### SUPPLEMENTARY MATERIALS

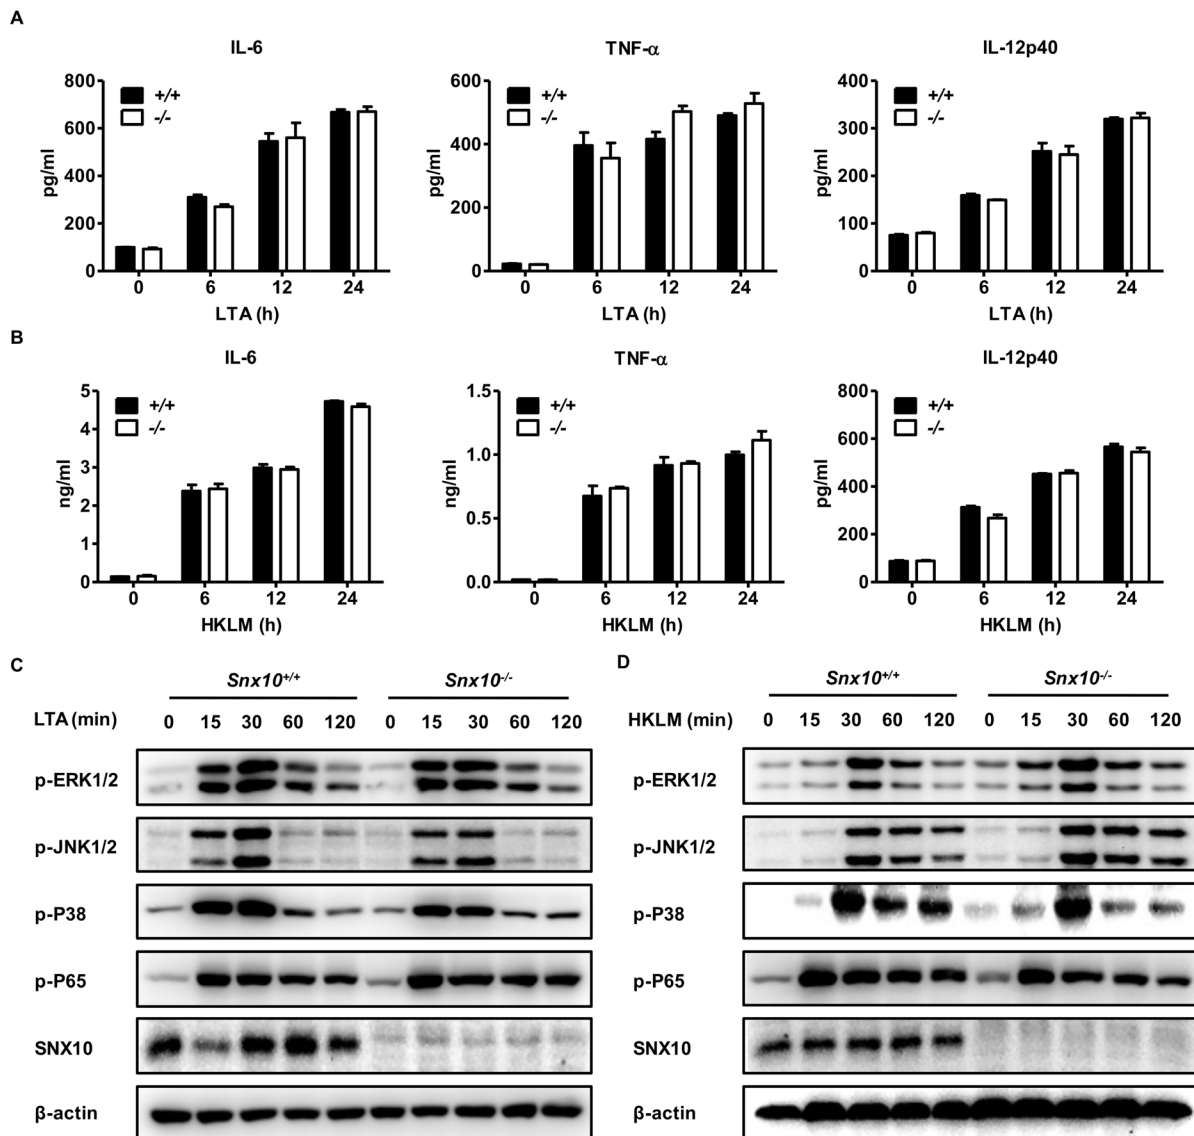

**Supplementary Figure 1: Loss of SNX10 does not affect TLR signaling pathways and cytokine production.** (A, B) ELISA of TNF- $\alpha$ , IL-6 and IL-12p40 in the supernatant of WT or *Snx10*<sup>-/-</sup> BMDMs after LTA (2  $\mu$ g/mL) stimulation or HKLM (MOI, 20) infection for the indicated time. (C, D) Immunoblot analysis of phosphorylated (p-) ERK, JNK, P38 and P65 in lysates of WT or *Snx10*<sup>-/-</sup> BMDMs after LTA (2  $\mu$ g/mL) stimulation or HKLM (MOI, 20) infection for the indicated time, with  $\beta$ -actin as a loading control. Data are representative of three independent experiments with similar results.

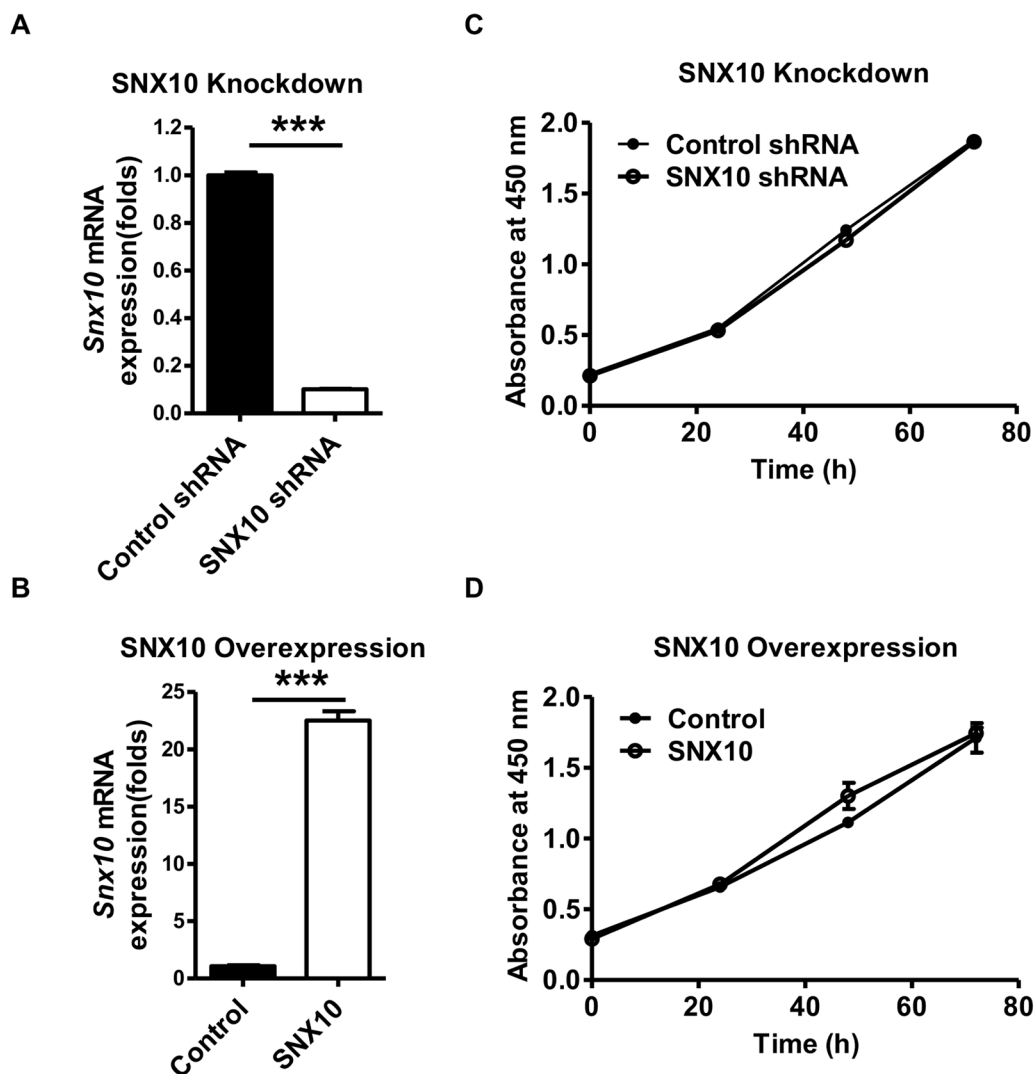

**Supplementary Figure 2: SNX10 does not affect the proliferation of macrophage.** (A, B) Detection of SNX10 level in RAW264.7 cells stably expressing control and SNX10 shRNA (A), or stably expressing control and SNX10 (B) by Q-PCR analysis, \*\*\*P<0.001. (C, D) Cell proliferation assay of RAW264.7 cells stably expressing control and SNX10 shRNA (C), or stably expressing control and SNX10 (D) using CCK-8, Data are expressed as the absorbance at 450 nm. Data are representative of three independent experiments with similar results.

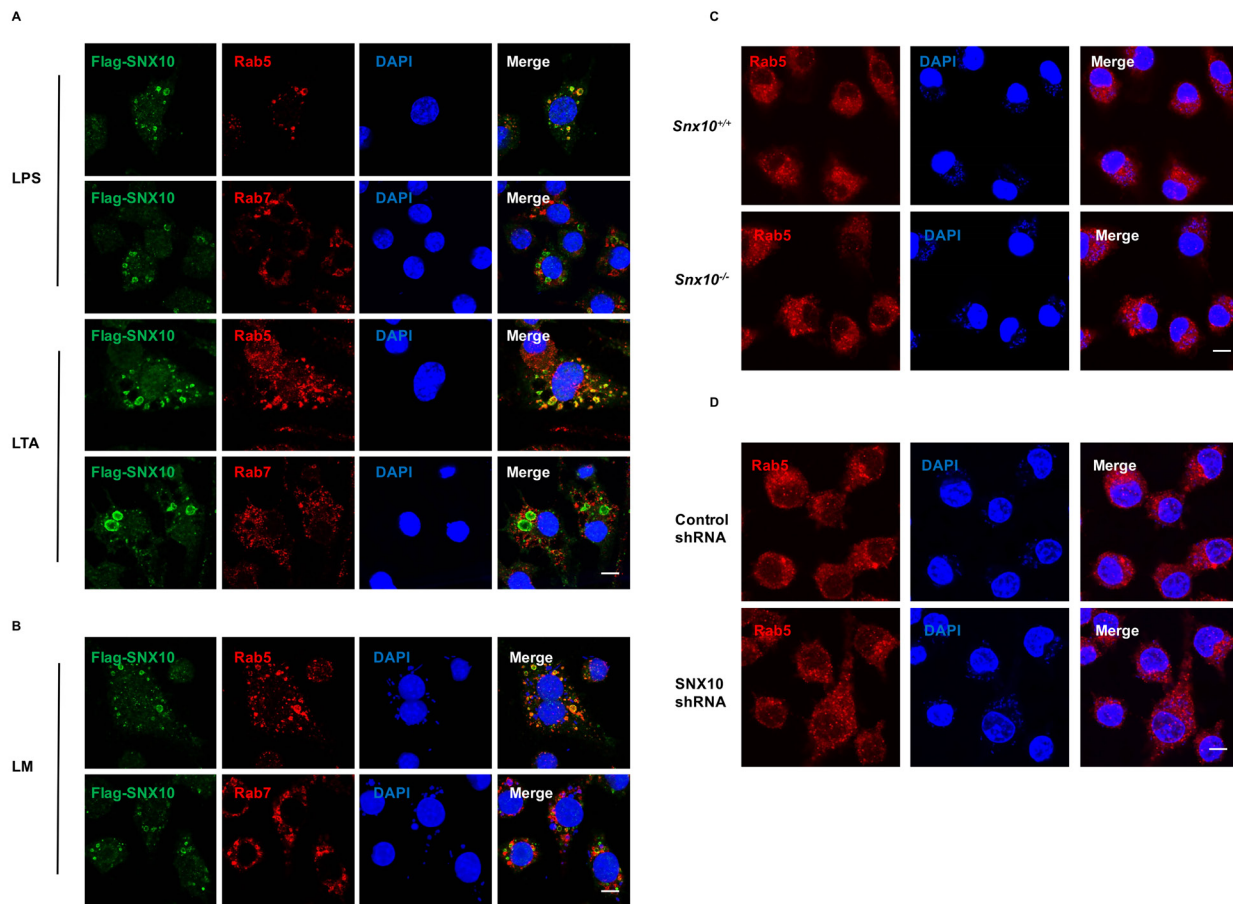

**Supplementary Figure 3: Absence of SNX10 does not affect early endosomes and phagosomes.** (A, B) Confocal images showing the co-localization of Flag-SNX10 (Green) with Rab5, Rab7 (Red) in RAW264.7 cells stably expressing Flag-SNX10 under LPS (1  $\mu\text{g}/\text{mL}$ ) or LTA stimulation (2  $\mu\text{g}/\text{mL}$ ) (A) or *L. monocytogenes* (LM) infection (MOI, 20) (B) for 3 h. Co-localization of the two colors is depicted by yellow in the images. (C, D) Confocal images showing the early endosomes or phagosomes (Rab5-positive) in WT and *Snx10*<sup>-/-</sup> BMDMs (C) or RAW264.7 cells stably expressing control or SNX10 shRNA (D) after infection with *L. monocytogenes* (MOI, 20) for 3 h. Scale bars represent 10  $\mu\text{m}$ . Data are representative of three independent experiments with similar results.

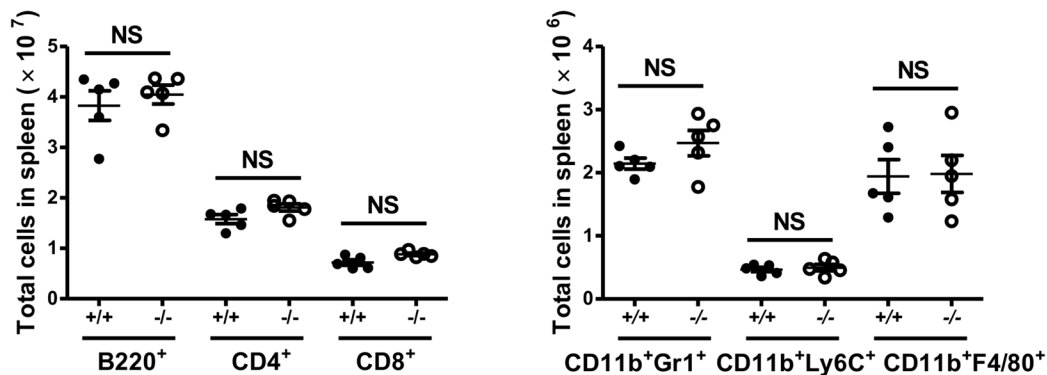

**Supplementary Figure 4: There are similar numbers of immune cells in WT and *Snx10*<sup>-/-</sup> mice after injection with PBS.** Different cell types were counted in WT and *Snx10*<sup>-/-</sup> mice after intravenous injection with PBS for 72 h. NS, no significance. Data are representative of three independent experiments with similar results.

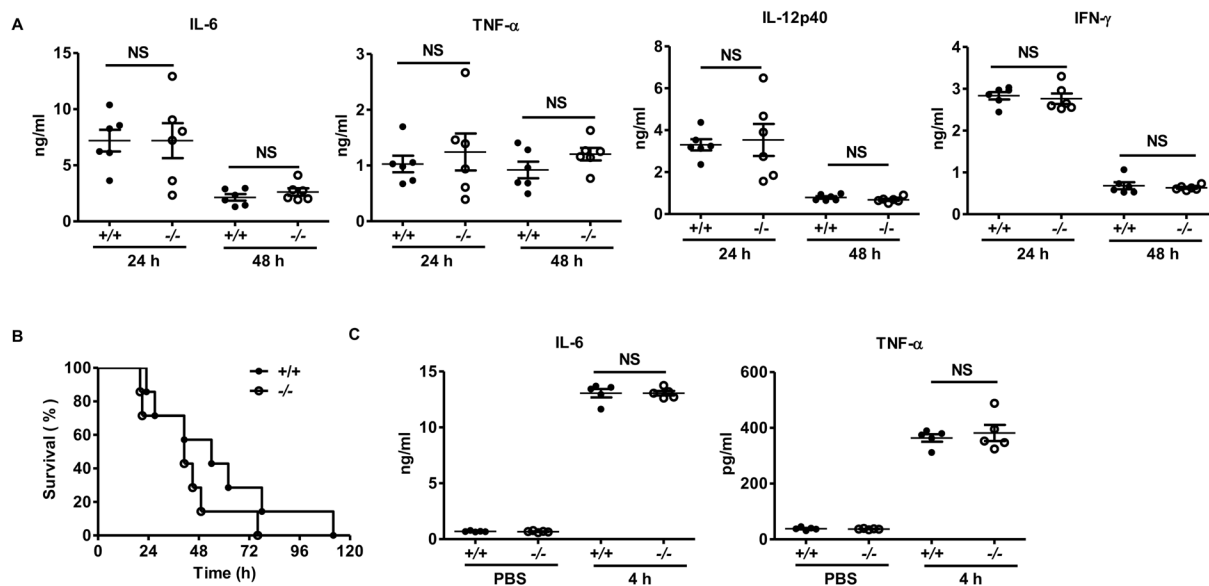

**Supplementary Figure 5: SNX10 deficiency has no effect on the production of cytokines after infection *in vivo*.** (A) ELISA of TNF- $\alpha$ , IL-6, IFN- $\gamma$ , and IL12p40 in serum collected at 24 or 48 h after intravenous injection with  $2 \times 10^5$  *L. monocytogenes*; (B) Survival of WT and *Snx10*<sup>-/-</sup> mice after intraperitoneal injection with LPS (15 mg/kg body weight) and monitored every hour after infection, n=7 mice per genotype; (C) ELISA of TNF- $\alpha$  and IL-6 in serum collected at 4 h after intraperitoneal injection with PBS or LPS as B, each symbol represents an individual mouse. NS, no significance. Data are representative of three independent experiments with similar results.
